# Supplementary material for: Chasm in primary care provision in a universal health system: Findings from a nationally representative survey of health facilities in Malaysia
Source: PubMed Central journal article supplement (PMC5308860; doi:10.1371/journal.pone.0172229), 2017-02-14
Supplement: pone.0172229.s001.pdf [file pone.0172229.s001.pdf]

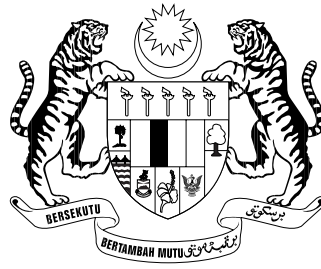

## **NATIONAL HEALTHCARE ESTABLISHMENT AND WORKFORCE SURVEY (NHEWS) FORM**

# **PRIMARY CARE**

A Collaboration of:  
**Medical Development Division, Medical Practice Division,  
Family Health Development Division, Medical Device Bureau,  
and Clinical Research Centre, National Institutes of Health.**

## INSTRUCTIONS TO PRIMARY CARE

1. Section 1 is best filled by the Person in-Charge in the Administration Department.
2. Section 2 to Section 6 is best filled by Heads of Department or Person in-Charge of the relevant services/ departments.
3. Any queries please contact the Healthcare Statistics Unit, Clinical Research Centre at 03-4043 9300/ 9400 or fax 03-4043 9500 or email [hsu@crc.gov.my](mailto:hsu@crc.gov.my).

### National Healthcare Establishment and Workforce Survey (NHEWS): Primary Care

#### General Instructions

1. Please ensure that all sections of the NHEWS: Primary Care questionnaire have been provided. These include:
  - SECTION 1: ESTABLISHMENT DETAILS
  - SECTION 2: FACILITIES (2010)
  - SECTION 3: HEALTHCARE ACTIVITIES & SERVICES (2010)
  - SECTION 4: HEALTH WORKFORCE (2010)
  - SECTION 5: DOCTORS' DETAILS AS REPORTED ON 31/12/2010
  - SECTION 6: MEDICAL DEVICES (2010)If any section has not been provided in the manual please contact us.
2. Data collected is for the year 2010.
3. Registration and data submission may be conducted in two ways:
  - Option 1: NHEWS: Primary Care web (online) survey
  - Option 2: NHEWS: Primary Care paper survey
4. Please provide the contact information in the **Information of person coordinating this survey (Primary Care Survey, Section 1)**.  
*(This information will be used to contact your establishment for the purpose of data clarification or dissemination of project updates.)*
5. Where check boxes are provided, you may check one or more boxes. Where radio buttons are provided, check one box only.
6. Where a particular variable is not available or not applicable at your establishment, please enter 0.

#### Option 1 - NHEWS: Primary Care web(online) survey

1. Unique usernames will be provided.  
*(Each clinic will have a unique username and password that will enable viewing and editing of data for that respective clinic. To ensure the security of your data, please limit the number of users.)*
2. Log on to our website <http://www.crc.gov.my/nhsi>
3. After completing each section, please click the "Save" button.

#### Option 2 - NHEWS: Primary Care paper survey

1. The questionnaire has been provided in the manual and is downloadable from our website at <http://www.crc.gov.my/nhsi>.
2. All completed data must be returned using the pre-paid envelopes to the address below:

**Kementerian Kesihatan Malaysia**  
Clinical Research Centre Surveys and Research Projects  
3<sup>rd</sup> Floor, MMA House  
124, Jalan Pahang  
53000 Kuala Lumpur

#### Section 5: Doctors' Details as Reported on 31/12/2010

1. For establishments with only a few personnel please complete Section 5: Doctors' Details as Reported on 31/12/2010.
2. For establishments with a large number of staff kindly email the staff listing in an EXCEL spreadsheet or other electronic document to [hsu@crc.gov.my](mailto:hsu@crc.gov.my) or login to our website <http://www.crc.gov.my/nhsi> and upload using your username.
3. Doctor(s) to be included are Medical Officers (excluding House Officers), Specialists and Consultants.

**Instruction:** i) Where check boxes  are provided, check (✓) one or more boxes. Where radio buttons  are provided, check (✓) one box only.  
 ii) All data is for the year 2010 unless indicated otherwise.

Important:

- If you prefer to complete the survey online, please go to [www.crc.gov.my/nhsi](http://www.crc.gov.my/nhsi)  
 Sekiranya anda ingin mengisi borang secara online, sila layari [www.crc.gov.my/nhsi](http://www.crc.gov.my/nhsi)
- If you are submitting a hard copy form, please return the form via fax to 03-4043 9500 or post using the prepaid envelope provided to the address below:-  
 Sekiranya anda mengisi borang kertas, sila kembalikan melalui faks 03-4043 9500 atau melalui pos berdaftar ke alamat berikut:

KEMENTERIAN KESIHATAN MALAYSIA,  
 Clinical Research Centre Surveys and Research Projects,  
 3rd Floor, MMA House, 124, Jalan Pahang, 53000 Kuala Lumpur.

- For any enquiries, kindly contact the Healthcare Statistics Unit at 03-4043 9300, or fax 03-4043 9500, or email [hsu@crc.gov.my](mailto:hsu@crc.gov.my)  
 Jika terdapat sebarang pertanyaan, sila hubungi Unit Statistik Perkhidmatan Kesihatan di talian: 03-4043 9300, atau faks 03-4043 9500, atau emel [hsu@crc.gov.my](mailto:hsu@crc.gov.my)

**SECTION 1 : ESTABLISHMENT DETAILS / MAKLUMAT PREMIS YANG DITUBUHKAN**

|                                                                                                                                                |                                                                                                                                                                                                                                                                                                                                                                               |                                                                                                                                                                                                                                                                                                                                                                                                                                                                                                                                                                                   |                                    |
|------------------------------------------------------------------------------------------------------------------------------------------------|-------------------------------------------------------------------------------------------------------------------------------------------------------------------------------------------------------------------------------------------------------------------------------------------------------------------------------------------------------------------------------|-----------------------------------------------------------------------------------------------------------------------------------------------------------------------------------------------------------------------------------------------------------------------------------------------------------------------------------------------------------------------------------------------------------------------------------------------------------------------------------------------------------------------------------------------------------------------------------|------------------------------------|
| <b>1. Name of establishment</b><br>* Nama pertubuhan                                                                                           |                                                                                                                                                                                                                                                                                                                                                                               |                                                                                                                                                                                                                                                                                                                                                                                                                                                                                                                                                                                   |                                    |
| <b>2. Owner of the establishment</b><br>Pemilik pertubuhan                                                                                     |                                                                                                                                                                                                                                                                                                                                                                               |                                                                                                                                                                                                                                                                                                                                                                                                                                                                                                                                                                                   |                                    |
| <b>3. District Health Office</b><br>* Pejabat Kesihatan Daerah /<br>bahagian / kawasan<br>(For public clinics only/<br>Klinik kerajaan sahaja) |                                                                                                                                                                                                                                                                                                                                                                               |                                                                                                                                                                                                                                                                                                                                                                                                                                                                                                                                                                                   |                                    |
| <b>4. Address</b><br>* Alamat                                                                                                                  | <b>Postcode</b><br>Poskod                                                                                                                                                                                                                                                                                                                                                     | <input type="text"/>                                                                                                                                                                                                                                                                                                                                                                                                                                                                                                                                                              | <b>City / Town</b><br>Bandar/Pekan |
|                                                                                                                                                | <b>District</b><br>Daerah                                                                                                                                                                                                                                                                                                                                                     | <input type="text"/>                                                                                                                                                                                                                                                                                                                                                                                                                                                                                                                                                              |                                    |
|                                                                                                                                                | <b>State</b><br>Negeri                                                                                                                                                                                                                                                                                                                                                        | <input type="radio"/> Perlis <input type="radio"/> Selangor <input type="radio"/> Pahang <input type="radio"/> Sarawak<br><input type="radio"/> Kedah <input type="radio"/> Negeri Sembilan <input type="radio"/> Terengganu <input type="radio"/> Wilayah Persekutuan Kuala Lumpur<br><input type="radio"/> Pulau Pinang <input type="radio"/> Melaka <input type="radio"/> Kelantan <input type="radio"/> Wilayah Persekutuan Putrajaya<br><input type="radio"/> Perak <input type="radio"/> Johor <input type="radio"/> Sabah <input type="radio"/> Wilayah Persekutuan Labuan |                                    |
|                                                                                                                                                | <b>5. Contact information</b><br>Talian                                                                                                                                                                                                                                                                                                                                       | <b>*Office phone</b><br>Telefon pejabat                                                                                                                                                                                                                                                                                                                                                                                                                                                                                                                                           | <input type="text"/>               |
| <b>6. Entrepreneurship</b><br>* Keusahawanan<br>(For private clinics only<br>Klinik swasta sahaja)                                             | <input type="radio"/> Sole proprietor / Tuan punya tunggal <input type="radio"/> Partnership / Perkongsian<br><input type="radio"/> Corporate body / Pertubuhan perbadanan <input type="radio"/> Society / Persatuan                                                                                                                                                          |                                                                                                                                                                                                                                                                                                                                                                                                                                                                                                                                                                                   |                                    |
| <b>7. Sector</b><br>* Sektor                                                                                                                   | <input type="radio"/> Ministry Of Health / Kementerian Kesihatan <input type="radio"/> Armed forces / Angkatan tentera<br><input type="radio"/> University / Universiti <input type="radio"/> Non-government organization / Organisasi bukan kerajaan<br><input type="radio"/> Private / Swasta                                                                               |                                                                                                                                                                                                                                                                                                                                                                                                                                                                                                                                                                                   |                                    |
| <b>8. Year commenced operations</b><br>* Tahun mula beroperasi                                                                                 | <input type="text"/>                                                                                                                                                                                                                                                                                                                                                          |                                                                                                                                                                                                                                                                                                                                                                                                                                                                                                                                                                                   |                                    |
| <b>9. Type of practice</b><br>* Jenis amalan<br>(For private clinics only<br>Klinik swasta sahaja)                                             | <input type="radio"/> Individual / Perseorangan <input type="radio"/> Group / Berkumpulan                                                                                                                                                                                                                                                                                     |                                                                                                                                                                                                                                                                                                                                                                                                                                                                                                                                                                                   |                                    |
| <b>10. Type of establishment</b><br>* Jenis pertubuhan<br>(For private clinics only<br>Klinik swasta sahaja)                                   | <input type="radio"/> General practice clinic / Klinik perubatan am<br><input type="radio"/> Specialist clinic / Klinik pakar → <input type="text"/> Please specify / Sila nyatakan                                                                                                                                                                                           |                                                                                                                                                                                                                                                                                                                                                                                                                                                                                                                                                                                   |                                    |
| <b>11. Type of clinic</b><br>Jenis klinik<br>(For public clinics only<br>Klinik kerajaan sahaja)                                               | <input type="radio"/> Klinik kesihatan → <input type="radio"/> Type 1 / Jenis 1 <input type="radio"/> Type 2 / Jenis 2 <input type="radio"/> Type 3 / Jenis 3 <input type="radio"/> Type 4 / Jenis 4 <input type="radio"/> Type 5 / Jenis 5 <input type="radio"/> Type 6 / Jenis 6<br><input type="radio"/> Others, specify / Lain-lain, sila nyatakan → <input type="text"/> |                                                                                                                                                                                                                                                                                                                                                                                                                                                                                                                                                                                   |                                    |
| <b>12. Services provided</b><br>* Perkhidmatan yang disediakan<br>(For public clinics only<br>Klinik kerajaan sahaja)                          | <input type="checkbox"/> Maternal Child Health (MCH) /<br>Kesihatan ibu dan anak <input type="checkbox"/> Dental / Pergigian<br><input type="checkbox"/> Outpatient / Perkhidmatan pesakit luar <input type="checkbox"/> Accident & Emergency services /<br>Perkhidmatan kecemasan dan trauma (kemalangan)                                                                    |                                                                                                                                                                                                                                                                                                                                                                                                                                                                                                                                                                                   |                                    |
| <b>13. Information of person coordinating this survey</b><br>Maklumat pihak bertanggungjawab bagi kaji selidik ini                             | <b>* Name</b><br>Nama                                                                                                                                                                                                                                                                                                                                                         | <input type="text"/>                                                                                                                                                                                                                                                                                                                                                                                                                                                                                                                                                              |                                    |
|                                                                                                                                                | <b>* Designation</b><br>Jawatan                                                                                                                                                                                                                                                                                                                                               | <input type="text"/>                                                                                                                                                                                                                                                                                                                                                                                                                                                                                                                                                              |                                    |
|                                                                                                                                                | <b>* Office phone</b><br>Telefon pejabat                                                                                                                                                                                                                                                                                                                                      | <input type="text"/>                                                                                                                                                                                                                                                                                                                                                                                                                                                                                                                                                              | <b>Ext:</b> <input type="text"/>   |
|                                                                                                                                                | <b>Handphone</b><br>Telefon bimbit                                                                                                                                                                                                                                                                                                                                            | <input type="text"/>                                                                                                                                                                                                                                                                                                                                                                                                                                                                                                                                                              |                                    |
|                                                                                                                                                | <b>Fax</b><br>Faks                                                                                                                                                                                                                                                                                                                                                            | <input type="text"/>                                                                                                                                                                                                                                                                                                                                                                                                                                                                                                                                                              | <b>Email</b><br>E-mel              |

Instruction: i) Where check boxes  are provided, check (✓) one or more boxes. Where radio buttons  are provided, check (✓) one box only.

**SECTION 2 : FACILITIES / KEMUDAHAN (2010)**

Note: Please tick the facilities that are available at your establishment. / Sila tandakan kemudahan yang sedia ada di pertubuhan anda.

|                                                                                |                                                                                                                                                   |                                                                                                                         |
|--------------------------------------------------------------------------------|---------------------------------------------------------------------------------------------------------------------------------------------------|-------------------------------------------------------------------------------------------------------------------------|
| <b>1. Does your establishment have</b><br>Adakah pertubuhan anda memiliki      | <input type="checkbox"/> A triage system for assessing patients<br>Sistem triaj untuk saringan pesakit                                            | <input type="checkbox"/> Ambulance services managed by your establishment<br>Perkhidmatan ambulans yang diurus sendiri  |
|                                                                                | <input type="checkbox"/> Pharmacy space<br>Ruang farmasi                                                                                          | Number of functional ambulances available<br>Bilangan ambulans yang berfungsi <input type="text"/> <input type="text"/> |
| <input type="checkbox"/> Laboratory space<br>Ruang makmal                      | <input type="checkbox"/> Autoclaving facilities for sterilisation of medical equipment<br>Kemudahan autoklaf bagi pensterilan peralatan perubatan |                                                                                                                         |
| <input type="checkbox"/> Diagnostic/Imaging room<br>Bilik diagnostik / imbasan | <input type="checkbox"/> None<br>Tiada                                                                                                            |                                                                                                                         |

**SECTION 3 : HEALTHCARE ACTIVITIES & SERVICES / AKTIVITI & PERKHIDMATAN KESIHATAN (2010)**

|                                                                                                          |                                                                                                                                                                                                                                                                                                                                                                                                                                                                                                                                                |                                                                                                                                              |                                                                                                                                     |  |
|----------------------------------------------------------------------------------------------------------|------------------------------------------------------------------------------------------------------------------------------------------------------------------------------------------------------------------------------------------------------------------------------------------------------------------------------------------------------------------------------------------------------------------------------------------------------------------------------------------------------------------------------------------------|----------------------------------------------------------------------------------------------------------------------------------------------|-------------------------------------------------------------------------------------------------------------------------------------|--|
| <b>1. Operating hours</b><br>Waktu beroperasi                                                            | <b>a. Public clinics</b><br>Klinik kerajaan                                                                                                                                                                                                                                                                                                                                                                                                                                                                                                    | <input type="checkbox"/> Office hours / Waktu pejabat<br><input type="checkbox"/> After hours on call services / Perkhidmatan atas panggilan | <input type="checkbox"/> Extended hours / Lebih masa<br><input type="checkbox"/> 10am – 10pm daily / 10 pagi - 10 malam setiap hari |  |
|                                                                                                          | <b>b. Private clinics</b><br>Klinik swasta                                                                                                                                                                                                                                                                                                                                                                                                                                                                                                     | <input type="radio"/> Less than 24 hours / Kurang daripada 24 jam                                                                            | <input type="radio"/> 24 hours / 24 jam                                                                                             |  |
| <b>2. Does your establishment have these services</b><br>Adakah pertubuhan anda menyediakan perkhidmatan | <input type="checkbox"/> Management of acute illnesses / Rawatan penyakit akut<br><input type="checkbox"/> Management of chronic diseases / Rawatan penyakit kronik<br><input type="checkbox"/> Antenatal & postnatal care / Penjagaan antenatal & postnatal                                                                                                                                                                                                                                                                                   | <input type="checkbox"/> Low risk deliveries / Kelahiran berisiko rendah                                                                     | Total number / Jumlah <input type="text"/> <input type="text"/>                                                                     |  |
|                                                                                                          | <input type="checkbox"/> Family planning / Perancangan keluarga<br><input type="checkbox"/> Pap smear (cervical screening) / Pap smear<br><input type="checkbox"/> Clinical breast examinations / Pemeriksaan klinikal payudara<br><input type="checkbox"/> Medical check-ups / examinations / Pemeriksaan kesihatan<br><input type="checkbox"/> Occupational health / Kesihatan cara kerja<br><input type="checkbox"/> Smoking cessation programmes / Program berhenti merokok<br><input type="checkbox"/> Minor surgeries / Pembedahan minor |                                                                                                                                              |                                                                                                                                     |  |
|                                                                                                          | <input type="checkbox"/> Laboratory services / Perkhidmatan makmal                                                                                                                                                                                                                                                                                                                                                                                                                                                                             | <input type="checkbox"/> In-house / Dalam<br><input type="checkbox"/> Out-sourced / Khidmat luar                                             |                                                                                                                                     |  |
|                                                                                                          | <input type="checkbox"/> Dispensing / Pendiagnosisan ubat<br><input type="checkbox"/> None / Tiada                                                                                                                                                                                                                                                                                                                                                                                                                                             |                                                                                                                                              |                                                                                                                                     |  |
|                                                                                                          | <b>3. Total number of attendances</b><br>* (With or without doctors' consultation)<br>Jumlah kehadiran pesakit (dengan atau tanpa rundingan doktor)                                                                                                                                                                                                                                                                                                                                                                                            | <input type="text"/> <input type="text"/> <input type="text"/> <input type="text"/> <input type="text"/> <input type="text"/>                |                                                                                                                                     |  |
|                                                                                                          | <b>3.1 Face to face consults</b><br>Perundingan secara bersemuka                                                                                                                                                                                                                                                                                                                                                                                                                                                                               | <input type="text"/> <input type="text"/> <input type="text"/> <input type="text"/> <input type="text"/> <input type="text"/>                |                                                                                                                                     |  |
|                                                                                                          | <b>3.2 Home visits</b><br>Lawatan ke rumah                                                                                                                                                                                                                                                                                                                                                                                                                                                                                                     | <input type="text"/> <input type="text"/> <input type="text"/> <input type="text"/>                                                          |                                                                                                                                     |  |
|                                                                                                          | <b>3.3 Total number of antenatal attendances</b><br>Jumlah kehadiran pesakit antenatal                                                                                                                                                                                                                                                                                                                                                                                                                                                         | <input type="text"/> <input type="text"/> <input type="text"/> <input type="text"/>                                                          |                                                                                                                                     |  |
|                                                                                                          | <b>3.4 Total number of children attendances</b><br>Jumlah kehadiran pesakit kanak kanak                                                                                                                                                                                                                                                                                                                                                                                                                                                        | <input type="text"/> <input type="text"/> <input type="text"/> <input type="text"/>                                                          |                                                                                                                                     |  |

**SECTION 4 : HEALTH WORKFORCE / TENAGA KERJA BAGI PERKHIDMATAN KESIHATAN (2010)**

|                                                                                           |                                                                                     |
|-------------------------------------------------------------------------------------------|-------------------------------------------------------------------------------------|
| <b>1. Total number of medical doctors</b><br>* Jumlah pegawai perubatan                   | <input type="text"/> <input type="text"/> <input type="text"/> <input type="text"/> |
| <b>2. Total number of nursing staff</b><br>Jumlah anggota kejururawatan                   |                                                                                     |
| <b>2.1. Staff nurses</b><br>Jururawat                                                     | <input type="text"/> <input type="text"/> <input type="text"/> <input type="text"/> |
| <b>2.2. Community nurses</b><br>Jururawat masyarakat                                      | <input type="text"/> <input type="text"/> <input type="text"/> <input type="text"/> |
| <b>2.3. Nursing aides</b><br>Pembantu klinik                                              | <input type="text"/> <input type="text"/> <input type="text"/> <input type="text"/> |
| <b>3. Total number of pharmacists</b><br>Jumlah pegawai farmasi                           | <input type="text"/> <input type="text"/> <input type="text"/> <input type="text"/> |
| <b>4. Total number of assistant medical officers</b><br>Jumlah penolong pegawai perubatan | <input type="text"/> <input type="text"/> <input type="text"/> <input type="text"/> |

Instruction: i) Where check boxes  are provided, check (✓) one or more boxes. Where radio buttons  are provided, check (✓) one box only.

SECTION 5 : DOCTORS' DETAILS AS REPORTED ON 31/12/2010 / MAKLUMAT TENAGA KERJA PERUBATAN PADA 31/12/2010

For establishments with a large number of staff, kindly email the staff listing in an Excel spreadsheet using the format provided, to hsu@crc.gov.my  
 Bagi Institusi dengan bilangan kakitangan yang besar, sila hantar senarai kakitangan dalam excel dengan mengikuti format yang disediakan kepada hsu@crc.gov.my

For public clinics, please provide details of permanent / resident doctors only  
 Bagi Klinik kerajaan, sila senaraikan maklumat doktor tetap sahaja

| Title<br>Gelaran | * Name of doctor(s)<br>(Name as per MyKad)<br>(Medical officers, specialists and consultants only)<br><br>Nama pengamal perubatan<br>(Nama seperti yang tercetak pada MyKad)<br>(Pegawai perubatan, pakar perubatan dan pakar perunding sahaja) | Identification<br>(Please fill in one or more of the information below)<br><br>Pengenalan<br>(Sila isi satu atau lebih daripada yang berikut)                                                                                                                                                                                                                                                                                                                                                                                                                                                                                                                                                                                                    | Type<br>Jenis                                                                              | Qualification<br>Kelayakan                                                                        | Post-graduate qualification<br>Kelayakan pascajianazah                                                                                                                                                                     | Duration spent in primary care<br>Tempoh bertugas dalam bidang kesihatan primer                             |
|------------------|-------------------------------------------------------------------------------------------------------------------------------------------------------------------------------------------------------------------------------------------------|--------------------------------------------------------------------------------------------------------------------------------------------------------------------------------------------------------------------------------------------------------------------------------------------------------------------------------------------------------------------------------------------------------------------------------------------------------------------------------------------------------------------------------------------------------------------------------------------------------------------------------------------------------------------------------------------------------------------------------------------------|--------------------------------------------------------------------------------------------|---------------------------------------------------------------------------------------------------|----------------------------------------------------------------------------------------------------------------------------------------------------------------------------------------------------------------------------|-------------------------------------------------------------------------------------------------------------|
|                  |                                                                                                                                                                                                                                                 | * MMC Number / Nombor MMC<br><input type="text"/> <input type="text"/> <input type="text"/> <input type="text"/> <input type="text"/> <input type="text"/><br>MyKad<br><input type="text"/> <input type="text"/> <input type="text"/> <input type="text"/> <input type="text"/> <input type="text"/> - <input type="text"/> <input type="text"/> - <input type="text"/> <input type="text"/> <input type="text"/> <input type="text"/><br>Other ID document No / Nombor pengenalan yang lain<br><input type="text"/><br>Specify document type (if others) / Sila nyatakan jenis dokumen<br><input type="radio"/> Passport / Pasport <input type="radio"/> Others / Lain-lain<br><input type="radio"/> Armed Force ID / Nombor Tentera atau Polis | <input type="radio"/> Permanent / resident Tetap<br><input type="radio"/> Visiting Pelawat | <input type="radio"/> Specialist Pakar<br><input type="radio"/> Medical officer Pegawai perubatan | <input type="radio"/> Masters in Family Medicine UM / UKM / USM<br><input type="radio"/> FRACGP holder<br><input type="radio"/> Masters in Public Health<br><input type="radio"/> Others, specify:<br><input type="text"/> | <input type="text"/> Years Tahun<br><input type="text"/> Months Bulan<br><input type="button" value="ADD"/> |
|                  |                                                                                                                                                                                                                                                 | * MMC Number / Nombor MMC<br><input type="text"/> <input type="text"/> <input type="text"/> <input type="text"/> <input type="text"/> <input type="text"/><br>MyKad<br><input type="text"/> <input type="text"/> <input type="text"/> <input type="text"/> <input type="text"/> <input type="text"/> - <input type="text"/> <input type="text"/> - <input type="text"/> <input type="text"/> <input type="text"/> <input type="text"/><br>Other ID document No / Nombor pengenalan yang lain<br><input type="text"/><br>Specify document type (if others) / Sila nyatakan jenis dokumen<br><input type="radio"/> Passport / Pasport <input type="radio"/> Others / Lain-lain<br><input type="radio"/> Armed Force ID / Nombor Tentera atau Polis | <input type="radio"/> Permanent / resident Tetap<br><input type="radio"/> Visiting Pelawat | <input type="radio"/> Specialist Pakar<br><input type="radio"/> Medical officer Pegawai perubatan | <input type="radio"/> Masters in Family Medicine UM / UKM / USM<br><input type="radio"/> FRACGP holder<br><input type="radio"/> Masters in Public Health<br><input type="radio"/> Others, specify:<br><input type="text"/> | <input type="text"/> Years Tahun<br><input type="text"/> Months Bulan<br><input type="button" value="ADD"/> |
|                  |                                                                                                                                                                                                                                                 | * MMC Number / Nombor MMC<br><input type="text"/> <input type="text"/> <input type="text"/> <input type="text"/> <input type="text"/> <input type="text"/><br>MyKad<br><input type="text"/> <input type="text"/> <input type="text"/> <input type="text"/> <input type="text"/> <input type="text"/> - <input type="text"/> <input type="text"/> - <input type="text"/> <input type="text"/> <input type="text"/> <input type="text"/><br>Other ID document No / Nombor pengenalan yang lain<br><input type="text"/><br>Specify document type (if others) / Sila nyatakan jenis dokumen<br><input type="radio"/> Passport / Pasport <input type="radio"/> Others / Lain-lain<br><input type="radio"/> Armed Force ID / Nombor Tentera atau Polis | <input type="radio"/> Permanent / resident Tetap<br><input type="radio"/> Visiting Pelawat | <input type="radio"/> Specialist Pakar<br><input type="radio"/> Medical officer Pegawai perubatan | <input type="radio"/> Masters in Family Medicine UM / UKM / USM<br><input type="radio"/> FRACGP holder<br><input type="radio"/> Masters in Public Health<br><input type="radio"/> Others, specify:<br><input type="text"/> | <input type="text"/> Years Tahun<br><input type="text"/> Months Bulan<br><input type="button" value="ADD"/> |

*Instruction: i) Where check boxes  are provided, check (✓) one or more boxes. Where radio buttons  are provided, check (✓) one box only.*

**SECTION 6 : MEDICAL DEVICES / PERALATAN PERUBATAN (2010)**

| Medical devices<br><i>Peralatan perubatan</i>                                        | Number of equipment available in 2010<br><i>Kuantiti peralatan pada 2010</i> |                                                   |
|--------------------------------------------------------------------------------------|------------------------------------------------------------------------------|---------------------------------------------------|
|                                                                                      | Functioning<br><i>Berfungsi</i>                                              | Non functioning<br><i>Tidak berfungsi</i>         |
| 1. Peak flow meter                                                                   | <input type="checkbox"/> <input type="checkbox"/>                            | <input type="checkbox"/> <input type="checkbox"/> |
| 2. Nebuliser                                                                         | <input type="checkbox"/> <input type="checkbox"/>                            | <input type="checkbox"/> <input type="checkbox"/> |
| 3. Glucometer                                                                        | <input type="checkbox"/> <input type="checkbox"/>                            | <input type="checkbox"/> <input type="checkbox"/> |
| 4. Doppler Fetal Monitor                                                             | <input type="checkbox"/> <input type="checkbox"/>                            | <input type="checkbox"/> <input type="checkbox"/> |
| 5. Nursing bag & set                                                                 | <input type="checkbox"/> <input type="checkbox"/>                            | <input type="checkbox"/> <input type="checkbox"/> |
| 6. Electrocardiogram machine (ECG)                                                   | <input type="checkbox"/>                                                     | <input type="checkbox"/>                          |
| 7. Resuscitation (emergency) trolley equipped with resuscitating equipment and drugs | <input type="checkbox"/>                                                     | <input type="checkbox"/>                          |
| 8. Defibrillator                                                                     | <input type="checkbox"/>                                                     | <input type="checkbox"/>                          |
| 9. Full blood count machine                                                          | <input type="checkbox"/>                                                     | <input type="checkbox"/>                          |
| 10. Bilirubinometer (Total bilirubin)                                                | <input type="checkbox"/>                                                     | <input type="checkbox"/>                          |
| 11. Chemistry analyser                                                               | <input type="checkbox"/>                                                     | <input type="checkbox"/>                          |
| 12. HbA1C analyser                                                                   | <input type="checkbox"/>                                                     | <input type="checkbox"/>                          |
| 13. Ultrasound machine                                                               | <input type="checkbox"/>                                                     | <input type="checkbox"/>                          |
| 14. General radiology unit (X-ray machine)                                           | <input type="checkbox"/>                                                     | <input type="checkbox"/>                          |

**SECTION 4: HEALTH WORKFORCE (2010)**

| NO | DATA ELEMENT               | DEFINITION                                                               |
|----|----------------------------|--------------------------------------------------------------------------|
| 1  | Medical doctors            | Any medical practitioner registered with the Malaysian Medical Council   |
| 2  | Staff nurses               | Any registered nurse with a degree or diploma in nursing                 |
| 3  | Community nurses           | Any registered nurse with a certificate in nursing                       |
| 4  | Nursing aides              | Clinic assistants with little or no formal training                      |
| 5  | Assistant medical officers | An assistant medical officer registered with the Medical Assistant Board |

**SECTION 5: DOCTORS' DETAILS AS REPORTED ON 31/12/2010**

| NO | DATA ELEMENT | DEFINITION                                                                                                                                                                                                                                                                                           |
|----|--------------|------------------------------------------------------------------------------------------------------------------------------------------------------------------------------------------------------------------------------------------------------------------------------------------------------|
| 1  | Resident     | An in-house medical practitioner who is available to diagnose and treat patients at your centre; and is a permanent staff in your establishment.                                                                                                                                                     |
| 2  | Visiting     | A medical practitioner who is available to diagnose and treat patients at your centre but he/she is not a permanent staff at that centre. The medical practitioner may make regular visits (eg monthly/ biweekly/ weekly etc) to see patients or is accessible on an ad-hoc or emergency basis only. |
| 3  | Specialist   | A registered medical practitioner with a post-graduate qualification recognized by both the Ministry of Health and the Public Service Department of Malaysia.                                                                                                                                        |

**SECTION 6 : MEDICAL DEVICES 2010**

| NO | DATA ELEMENT                                                                      | DEFINITION                                                                                                                                                                                                                                                                 |
|----|-----------------------------------------------------------------------------------|----------------------------------------------------------------------------------------------------------------------------------------------------------------------------------------------------------------------------------------------------------------------------|
| 1  | Peak flow meter                                                                   | A device used to measure air flow out of the lungs called the peak expiratory flow rate (PEFR), as a person forcefully blows into the device                                                                                                                               |
| 2  | Nebuliser                                                                         | A device used to reduce a liquid medication to extremely fine cloudlike particles; useful in delivering medication to deeper parts of the respiratory tract                                                                                                                |
| 3  | Glucometer                                                                        | A battery-operated point-of-care device for determining the approximate blood glucose concentration                                                                                                                                                                        |
| 4  | Electrocardiogram machine (ECG)                                                   | An electrical device intended for studying the activity of the heart based on changes in the voltage between pairs of electrodes placed at certain points on the skin                                                                                                      |
| 5  | Resuscitation (emergency) trolley equipped with resuscitating equipment and drugs | A portable trolley containing the necessary equipment and drugs required in cardiopulmonary resuscitation and emergency care of patients                                                                                                                                   |
| 6  | Defibrillator                                                                     | A medical electrical device intended to defibrillate the heart by electrical pulses via electrodes when the heart's own conduction slows dangerously or stops. It may or may not have transcutaneous pacing capabilities of electrically stimulating the heart externally. |
| 7  | Full blood count machine                                                          | A machine that analyses the number and types of cells in the blood to generate the commonly used test known as the full blood count (FBC)/ complete blood count (CBC)                                                                                                      |
| 8  | Bilirubinometer (Total bilirubin)                                                 | A device to measure the amount of bilirubin in the blood. The bilirubinometer is designed primarily to determine serum bilirubin levels in infants                                                                                                                         |
| 9  | Chemistry analyser                                                                | Laboratory analyzers that determine analyte concentrations in samples of plasma, serum, or less frequently in whole blood; they include analyzers used for blood gas and pH determinations.                                                                                |
| 10 | HbA1c analyser                                                                    | Medical equipment used to measure levels of HbA1c found in red blood cells (RBCs)                                                                                                                                                                                          |
| 11 | Doppler Fetal Monitor                                                             | Hand-held ultrasound transducer used to detect the heart beat of a foetus.                                                                                                                                                                                                 |
| 12 | Nursing bag & set                                                                 | A bag containing necessary articles usually carried by nurses during home visits to allow them to carry out nursing procedures with ease                                                                                                                                   |
| 13 | Ultrasound machine                                                                | Imaging equipment, which uses high-frequency sound waves to create images of internal structures.                                                                                                                                                                          |
| 14 | General radiology unit (X-ray machine)                                            | A device used to acquire an x-ray image to visualise structures within the body                                                                                                                                                                                            |

## SECTION 1: ESTABLISHMENT DETAILS

| NO | DATA ELEMENT                    | DEFINITION                                                                                                                                                                                                                                                                      |
|----|---------------------------------|---------------------------------------------------------------------------------------------------------------------------------------------------------------------------------------------------------------------------------------------------------------------------------|
| 1  | Name of establishment           | Name of establishment as per approved or licensed by the Ministry of Health Malaysia (Medical Practice Division-CKAPS)                                                                                                                                                          |
| 2  | Owner of the establishment      | Name of individual/ organisation/ society that the establishment belongs to.                                                                                                                                                                                                    |
| 3  | Address                         | Location where the establishment operates as per approved or licensed by the Ministry of Health Malaysia (Medical Practice Division- CKAPS)                                                                                                                                     |
| 4  | Sole proprietor                 | A business entity owned by one person. The owner may operate on his or her own or may employ others. The owner of the business has total and unlimited personal liability of the debts incurred by the business.                                                                |
| 5  | Corporate body                  | A body incorporated under the Companies Act 1965 [Act 125].                                                                                                                                                                                                                     |
| 6  | Partnership                     | A business entity in which two or more people operate for the common goal of making profit. Each partner has total and unlimited personal liability of the debts incurred by the partnership                                                                                    |
| 7  | Society                         | An association, club or body that is registered under the Societies Act 1966 with a membership consisting of seven (7) or more members in addition to having specific purposes                                                                                                  |
| 8  | Year commenced operations       | The year during which the establishment began operating.                                                                                                                                                                                                                        |
| 9  | Individual Practice             | Clinic practice run by one permanent doctor                                                                                                                                                                                                                                     |
| 10 | Group Practice                  | Clinic practice run by more than one permanent doctor                                                                                                                                                                                                                           |
| 11 | General Practice Clinic         | A clinic providing primary care services to the community. This service can be provided by a medical officer and/or a specialist in the field of family medicine                                                                                                                |
| 12 | Specialist Clinic               | A clinic with at least one resident specialist in a field besides family medicine that is accepted by the National Specialist Register of Malaysia.                                                                                                                             |
| 13 | Types of Klinik Kesihatan       | Type 1:> 800 patient attendances per day<br>Type 2:500 - 800 patient attendances per day<br>Type 3:300 - 500 patient attendances per day<br>Type 4:150 - 300 patient attendances per day<br>Type 5:< 150 patient attendances per day<br>Type 6:< 50 patient attendances per day |
| 14 | Person coordinating this survey | Name of staff designated to liaise with the NHEWS Secretariat members on matters pertaining to NHEWS.                                                                                                                                                                           |

## SECTION 2: FACILITIES (2010)

| NO | DATA ELEMENT                                                  | DEFINITION                                                                                                                                                                                                                                                |
|----|---------------------------------------------------------------|-----------------------------------------------------------------------------------------------------------------------------------------------------------------------------------------------------------------------------------------------------------|
| 1  | A triage system for assessing patients                        | A system that is dedicated to sorting patients into groups based on their need for or likely benefit from immediate medical treatment. It is the first clinic workstation encountered by patients upon arrival for medical review                         |
| 2  | Laboratory space                                              | The work area within the clinic where laboratory support services are carried out. It usually consists of a "clean area" (for clerical, post analytical and validation work) and a dirty area (for pre analytical, analytical and sample buffering area). |
| 3  | Diagnostic/Imaging room                                       | Designated room for x-ray device(s)                                                                                                                                                                                                                       |
| 4  | Ambulance services managed by your establishment              | Emergency transport services that are run by staff that belong to the same management as the clinic.                                                                                                                                                      |
| 5  | Autoclaving facilities for sterilisation of medical equipment | Availability of the autoclave apparatus for the purpose of sterilisation of equipment used on patients. The apparatus may be in house or located away from the clinic premises                                                                            |

## SECTION 3: HEALTHCARE ACTIVITIES &amp; SERVICES (2010)

| NO | DATA ELEMENT                     | DEFINITION                                                                                                                                                                                                                                                                                                                                                                                                                                                                           |
|----|----------------------------------|--------------------------------------------------------------------------------------------------------------------------------------------------------------------------------------------------------------------------------------------------------------------------------------------------------------------------------------------------------------------------------------------------------------------------------------------------------------------------------------|
| 1  | Office hours                     | From 8am to 5pm on weekdays and non-public holidays                                                                                                                                                                                                                                                                                                                                                                                                                                  |
| 2  | Extended hours                   | The clinic is open and is providing services after office hours                                                                                                                                                                                                                                                                                                                                                                                                                      |
| 3  | After hours on call services     | The clinic is closed however staff are on standby to provide medical services if required after office hours                                                                                                                                                                                                                                                                                                                                                                         |
| 4  | Management of acute illnesses    | Management of any illness characterized by signs and symptoms of rapid onset and short duration.                                                                                                                                                                                                                                                                                                                                                                                     |
| 5  | Management of chronic diseases   | Management of any condition that has a protracted (usually $\geq$ 6 months) clinical course                                                                                                                                                                                                                                                                                                                                                                                          |
| 6  | Antenatal & postnatal care       | Services rendered to patients during pregnancy and up to 42 days postpartum                                                                                                                                                                                                                                                                                                                                                                                                          |
| 7  | Low risk deliveries              | Delivery in a pregnancy that is anticipated to be problem free from antenatal to early intrapartum period. The assessment tool used to determine the status of the mother is the colour coding system. This tool indicates the status of the mother during that point of contact. When a mother has been continuously coded white throughout her pregnancy she is categorised as low risk and her labour can be conducted by a trained community health nurse (Jururawat Masyarakat) |
| 8  | Family planning                  | The conduct of educational and comprehensive medical activities which enable individuals to determine freely the number and spacing of their children and to select the means by which this may be achieved                                                                                                                                                                                                                                                                          |
| 9  | Pap smear (cervical screening)   | A simple smear method of examining stained exfoliative cells most commonly to detect cancers of the cervix                                                                                                                                                                                                                                                                                                                                                                           |
| 10 | Clinical breast examinations     | A physical examination of the breast performed by a health care provider to check for lumps or other changes.                                                                                                                                                                                                                                                                                                                                                                        |
| 11 | Medical check-ups / examinations | A thorough physical examination that may include a variety of tests depending on the age, sex and health of the person                                                                                                                                                                                                                                                                                                                                                               |
| 12 | Occupational health              | Health services concerned with the physical, mental and social well-being of an individual in relation to his/her working environment and with the adjustment of individuals to their work.                                                                                                                                                                                                                                                                                          |
| 13 | Smoking cessation programmes     | Specifically designed programmes offered to patients to aid in their efforts to stop smoking tobacco products                                                                                                                                                                                                                                                                                                                                                                        |
| 14 | Minor surgeries                  | Surgical procedures that can be conducted in a clinic setting without operating theatre facilities.                                                                                                                                                                                                                                                                                                                                                                                  |
| 15 | Attendance                       | An encounter between a patient and a healthcare professional in a clinic and includes all of the services provided during the encounter                                                                                                                                                                                                                                                                                                                                              |
| 16 | Face to face consults            | Encounter between a patient and a medical officer/ specialist that occurs in the clinic                                                                                                                                                                                                                                                                                                                                                                                              |
| 17 | Home visits                      | Encounter between a patient and a healthcare professional that occurs where the patient lives                                                                                                                                                                                                                                                                                                                                                                                        |
| 18 | Children attendances             | Patient visits by persons below the age of 12 years                                                                                                                                                                                                                                                                                                                                                                                                                                  |

SECTION- 4,5,6
